# Supplementary material
Source: HighWire-hosted journal article supplement (https://erj.ersjournals.com/content/54/4/1900528)
Supplement: inline-supplementary-material-1 [file inline-supplementary-material-1.pdf]

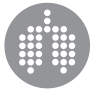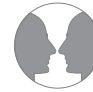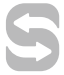

SHAREABLE PDF

# Time trends in diagnostic testing for primary ciliary dyskinesia in Europe

Florian S. Halbeisen <sup>1</sup>, Amelia Shoemark<sup>2,3</sup>, Angelo Barbato<sup>4,5</sup>, Mieke Boon<sup>6</sup>, Siobhan Carr <sup>2</sup>, Suzanne Crowley<sup>7</sup>, Rob Hirst<sup>8</sup>, Bulent Karadag<sup>9</sup>, Cordula Koerner-Rettberg<sup>10</sup>, Michael R. Loebinger<sup>11</sup>, Jane S. Lucas <sup>12</sup>, Bernard Maitre <sup>13,14</sup>, Henryk Mazurek<sup>15</sup>, Uğur Özçelik<sup>16</sup>, Vendula Martinů<sup>17</sup>, Nicolaus Schwerk<sup>18</sup>, Guillaume Thouvenin<sup>13,19,20</sup>, Stefan A. Tschanz <sup>21,22</sup>, Panayiotis Yiallourous<sup>23</sup>, Myrofora Goutaki <sup>1,24,25</sup> and Claudia E. Kuehni <sup>1,24,25</sup>

**Affiliations:** <sup>1</sup>Institute of Social and Preventive Medicine, University of Bern, Bern, Switzerland. <sup>2</sup>Dept of Paediatrics, Primary Ciliary Dyskinesia Centre, Royal Brompton and Harefield Foundation Trust, London, UK. <sup>3</sup>School of Medicine, University of Dundee, Dundee, UK. <sup>4</sup>Italian PCD Consortium. <sup>5</sup>Dept of Paediatrics, University of Padova, Padova, Italy. <sup>6</sup>Dept of Paediatrics, University Hospital Gasthuisberg, Leuven, Belgium. <sup>7</sup>Unit for Paediatric Heart, Lung, Allergic Diseases, Rikshospitalet, Oslo, Norway. <sup>8</sup>Dept of Infection, Immunity and Inflammation, Institute for Lung Health, University of Leicester, Leicester, UK. <sup>9</sup>Dept of Pediatric Pulmonology, Marmara University, School of Medicine, Istanbul, Turkey. <sup>10</sup>Dept of Paediatric Pneumology, University Children's Hospital of Ruhr University Bochum, Bochum, Germany. <sup>11</sup>Host Defence Unit, Royal Brompton and Harefield NHS Foundation Trust, London, UK. <sup>12</sup>Primary Ciliary Dyskinesia Centre, NIHR Respiratory Biomedical Research Centre, University of Southampton, Southampton, UK. <sup>13</sup>French Reference Centre for Rare Lung Diseases. <sup>14</sup>Hopital intercommunal de Créteil, Service de Pneumologie, DHU ATVB, Université Paris Est Créteil, Paris, France. <sup>15</sup>Dept of Pneumology and Cystic Fibrosis, Institute of Tuberculosis and Lung Disorders, Zdrój, Poland. <sup>16</sup>Dept of Pediatric Pulmonology, Hacettepe University Faculty of Medicine, Ankara, Turkey. <sup>17</sup>Pediatric Dept, Charles University Prague and University Hospital Motol, Prague, Czech Republic. <sup>18</sup>Clinic for Paediatric Pulmonology, Allergy and Neonatology, Hannover Medical School, Hannover, Germany. <sup>19</sup>Paediatric Pulmonary Dept, Trousseau Hospital APHP, Sorbonne Universities and Pierre et Marie Curie University, Paris, France. <sup>20</sup>Sorbonne Université, INSERM, Centre de Recherche Saint-Antoine, CRSA, Paris, France. <sup>21</sup>Swiss PCD registry (CH-PCD). <sup>22</sup>Institute of Anatomy, University of Bern, Bern, Switzerland. <sup>23</sup>Medical School, University of Cyprus, Nicosia, Cyprus. <sup>24</sup>Paediatric Respiratory Medicine, Children's University Hospital of Bern, University of Bern, Bern, Switzerland. <sup>25</sup>Both authors contributed equally.

**Correspondence:** Claudia E. Kuehni, University of Bern, Institute of Social and Preventive Medicine, Mittelstrasse 43, Bern 3012, Switzerland. E-mail: claudia.kuehni@ispm.unibe.ch

@ERSpublications

**Adherence to the 2009 ERS task force diagnostic recommendations was low. To further improve PCD diagnosis, we must be more diligent and engaging in implementing the new evidence-based guidelines published in 2017.** <http://bit.ly/2zvjpBh>

**Cite this article as:** Halbeisen FS, Shoemark A, Barbato A, *et al*. Time trends in diagnostic testing for primary ciliary dyskinesia in Europe. *Eur Respir J* 2019; 54: 1900528 [<https://doi.org/10.1183/13993003.00528-2019>].

This single-page version can be shared freely online.

*To the Editor:*

Despite recent advances in diagnostic methods, diagnosis of primary ciliary dyskinesia (PCD) remains complex. We need a combination of different diagnostic tests, and all have their limitations [1]. In 2009, the first European Respiratory Society (ERS) Task Force on PCD in children published recommendations [2], suggesting that: 1) nasal nitric oxide (nNO) should be measured to screen for PCD in patients aged  $\geq 5$  years [3]; and 2) video microscopy (VM) analysis of ciliary beat pattern and frequency [4] plus

electron microscopy (EM) [5] should be the key confirmatory diagnostic tests. Genetic testing was not recommended as part of the initial diagnostic testing, but as an additional test for inconclusive cases. The recommended test combination was nNO, VM and EM for patients aged  $\geq 5$  years and VM plus EM for younger patients.
